# Supplementary material for: The effects of intensive home treatment on self-efficacy in patients recovering from a psychiatric crisis
Source: Springer Nature journal article supplement (doi:10.1186/s13033-020-00426-y), 2021-01-06

# The effects of intensive home treatment on self-efficacy in patients recovering from a psychiatric crisis.

Ansam Barakat 1\*; Matthijs Blankers; Jurgen E Cornelis; Nick M Lommerse; Aartjan FT Beekman; Jack JM Dekker.

1) Arkin Mental Health Care, Department of Research, Klaprozenweg 111 1033 NN Amsterdam The Netherlands \* Correspondence @: [ansam.barakat@arkin.nl](mailto:ansam.barakat@arkin.nl)

## SUPPLEMENTARY MATERIAL

Fig. 1 Study selection Flowchart

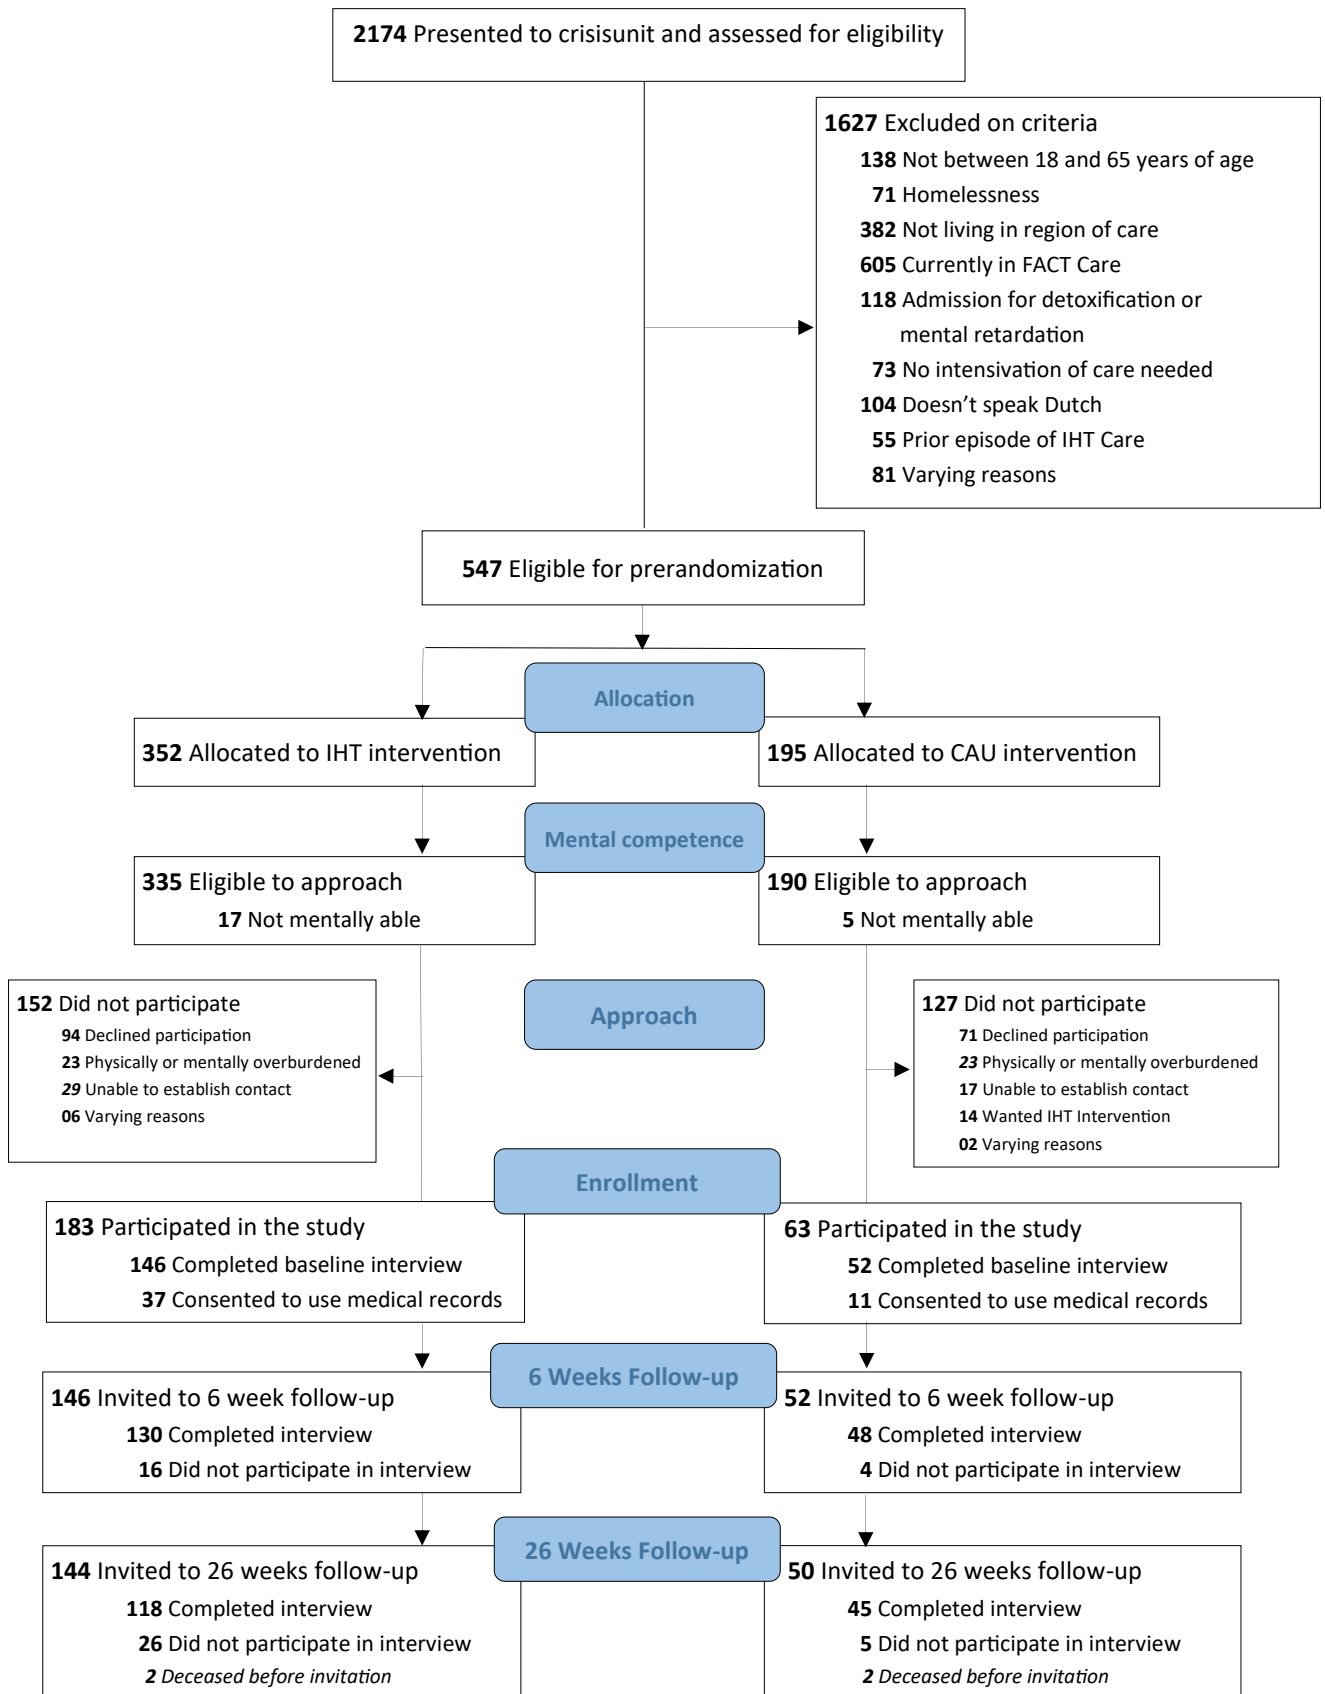

Supplement: MOESM1 [file 18741636]
